# Supplementary material for: Overexpression of a Phosphate Starvation Response AP2/ERF Gene From Physic Nut in Arabidopsis Alters Root Morphological Traits and Phosphate Starvation-Induced Anthocyanin Accumulation
Source: Front Plant Sci. 2018 Aug 20;9:1186. doi: 10.3389/fpls.2018.01186 (PMC6109760; doi:10.3389/fpls.2018.01186)
Supplement: TABLE S2 — The genes most strongly (≥3-fold) differentially expressed in roots (A) and leaves (B) under Pi-deficiency 2 and 16 days after the onset of treatment. [file Table_2.xlsx]

## Sheet: R-3 fold
	Table S2. The genes most strongly (≥3-fold) differentially expressed in roots and leaves under the Pi-deficient 2 d and 16 d after the onset of treatment.
	Table S2A. The genes most up- and down- regulated in physic nut roots under the Pi-deficient 2 d and 16 d after the onset of treatment.
	In roots	Expression ratio of P– to P+				Changes of ortholog genes in Arabidopsis under Pi starvation stress
	Gene identifier	R2d	R16d	Average level in roots of CK plants (TPM)	AtBESTBLAST	Misson et al., 2005, PNAS, 102: 11934–11939; Müller et al., 2007, Plant Physiol, 143:156–171
	ncRNA Precursor
	IPS1-1	7.96197	31.6504	4.6625
	IPS1-2	7.15162	11.5031	60.78
1	JCGZ_00630	3.0768	3.03146	16.32	AT5G01950 | Symbols: | Leucine-rich repeat protein kinase family protein
2	JCGZ_00770	3.25446	4.39726	4.32667	AT3G20660 | Symbols: AtOCT4, 4-Oct | organic cation/carnitine transporter4 FUNCTIONS IN: carbohydrate transmembrane transporter activity, sugar:hydrogen symporter activity; INVOLVED IN: transport, transmembrane transport; LOCATED IN: chloroplast thylakoid membrane, membrane; Disruption of AtOCT1, an organic cation transporter gene, affects root development and carnitine-related responses in Arabi…	up
3	JCGZ_00773	4.64865	5.05024	7.04	AT3G26300 | Symbols: CYP71B34. Variations in CYP74B2 (Hydroperoxide Lyase)	down
4	JCGZ_00787	3.3628	3.47345	3.5	AT5G48150 | Symbols: PAT1 | GRAS family transcription factor
5	JCGZ_01361	14.6031	6.95072	6.75	AT5G59190 | Symbols: | subtilase family protein
6	JCGZ_01377	7.57025	10.7914	1.57667	AT1G58280 | Symbols: | Phosphoglycerate mutase family protein	up
7	JCGZ_01716	5.76699	4.28106	9.99	AT3G07600 | Symbols: | Heavy metal transport/detoxification superfamily protein
8	JCGZ_02576	3.31135	4.79904	5.25333	AT1G64940 | Symbols: CYP89A6
9	JCGZ_02694	19.3314	6.42584	2.15667	AT5G07475 | Symbols: | Cupredoxin superfamily protein FUNCTIONS IN: electron carrier activity, copper ion binding; LOCATED IN: anchored to membrane;
10	JCGZ_02912	25.2214	4.72466	14.5533	AT2G29420 | Symbols: ATGSTU7, GST25, GSTU7 | glutathione S-transferase tau 7
11	JCGZ_02976	5.09556	10.9872	9.45333	AT2G29060 | Symbols: | GRAS family transcription factor
12	JCGZ_03295	19.7208	6.36043	11.6433	AT5G43360 | PHT1;3 | phosphate transporter 1;3////PHT1, PHT2, PHT3, and PHT4 family, which encode proteins involved in the acquisition of Pi across the plasma membrane, chloroplast, mitochondria, and Golgi, respectively	up
13	JCGZ_03448	10.4582	4.0531	6.68	AT3G60330 | Symbols: HA7 | H(+)-ATPase 7; FUNCTIONS IN: hydrogen-exporting ATPase activity, phosphorylative mechanism; INVOLVED IN: cation transport, metabolic process,
14	JCGZ_04358	37.6087	6.51724	2.7	AT4G31940 | Symbols: CYP82C4 The gene encodes a cytochrome P450 enzyme, CYP82C. It is involved in the early Fe deficiency response.
15	JCGZ_04370	3.00968	9.15574	6.4	AT4G19390 | Symbols: | Uncharacterised protein family (UPF0114)
16	JCGZ_05004	3.0249	3.94253	3.50333	AT3G21760 | Symbols: HYR1 | UDP-Glycosyltransferase, an inhibitor of cell expansion in vivo to form a bioactive glucoside.
17	JCGZ_05007	17.6422	12.2297	10.1933	AT1G09310 | Symbols: | Protein of unknown function, DUF538 Encodes SMALLER WITH VARIABLE BRANCHES (SVB), a protein with a conserved domain of unknown function (DUF538). The trichomes of the SVB mutants are smaller and exhibit branches of variable length and number.
18	JCGZ_05723	3.20956	3.30131	19.7833	emb|CBI27418.3|unnamed protein product [Vitis vinifera]
19	JCGZ_06151	4.48228	5.49362	7.97667	AT5G20150 ATSPX1, SPX DOMAIN GENE 1	up
20	JCGZ_07106	3.33259	3.1092	6.67	AT4G19810 | Symbols: | Glycosyl hydrolase family protein with chitinase insertion domain	up
21	JCGZ_07301	8.58537	4.29073	3.90667	AT2G25770 | Symbols: | Polyketide cyclase/dehydrase and lipid transport
22	JCGZ_07532	9.37575	16.2151	11.4167	AT5G20790 | Symbols: | unknown protein INVOLVED IN: biological_process unknown; LOCATED IN: endomembrane system;PHO2, micro RNA399 and PHR1 define a phosphate signaling pathway in plants.Genome-wide Analysis of the Arabidopsis Leaf Transcriptome Reveals Interaction of Phosphate and Sugar Metabolism.	up
23	JCGZ_07545	8.75072	5.14559	3.02333	AT1G53920 | Symbols: GLIP5 | GDSL-motif lipase 5
24	JCGZ_07710	7.12116	3.78799	10.35	AT5G19790 | Symbols: RAP2.11 | related to AP2 11..encodes a member of the ERF (ethylene response factor) subfamily B-6 of ERF/AP2 transcription factor family (RAP2.11). The Arabidopsis AP2/ERF Transcription Factor RAP2.11 Modulates Plant Response to Low-Potassium Conditions
25	JCGZ_07983	6.44628	4.51438	4.10333	AT1G70530 | Symbols: CRK3 | cysteine-rich RLK (RECEPTOR-like protein kinase) 3
26	JCGZ_09692	12.2326	907	0.526667	AT2G38110 | Symbols: ATGPAT6, GPAT6 | glycerol-3-phosphate acyltransferase 6
27	JCGZ_10495	14.1899	4.88982	10.7867	AT1G78380 | Symbols: ATGSTU19, GST8, GSTU19 | glutathione S-transferase TAU 19
28	JCGZ_11850	5.52899	3.00766	8.04667	AT4G17030 | Symbols: ATEXLB1, EXPR, AT-EXPR, ATEXPR1, ATHEXP BETA 3.1	up
29	JCGZ_12008	475	17.4571	1.77333	AT1G22065 | Symbols: | unknown protein
30	JCGZ_12655	57.0962	11.5769	1.11	AT3G13690 | Symbols: | Protein kinase protein with adenine nucleotide alphahydrolases-like domain
31	JCGZ_13189	10.822	5.06	10.3233	AT1G55740 | Symbols: AtSIP1, SIP1 Glycoside hydrolase, catalytic core (InterPro:IPR017853), Raffinose synthas; galactan:galactan galactosyltransferase
32	JCGZ_13856	3.732	5.97701	8.13667	No in Arabidopsis. ACG30487.1| hypothetical protein [Zea mays]
33	JCGZ_14570	7.159	13.7939	6.38667	AT2G45130 | Symbols: ATSPX3, SPX3 | SPX domain gene 3 //Structure and Expression Profile of the Arabidopsis PHO1 Gene Family Indicates a Broad Role in Inorganic Phosphate Homeostasis.	up
34	JCGZ_16064	3.55805	4.01186	20.2533	AT4G37370 | Symbols: CYP81D8 | cytochrome P450, family 81, subfamily D, polypeptide 8
35	JCGZ_16334	831	4.37462	6.30333	AT4G33840 | Symbols: | Glycosyl hydrolase family 10 protein
36	JCGZ_16830	10.6775	4.28198	9.06667	No. Gly-rich low weight protein
37	JCGZ_16831	31.4563	4.24779	2.81	No
38	JCGZ_17008	2.9826	9.81846	16.3467	AT5G20410 | Symbols: MGD2, ATMGD2 | monogalactosyldiacylglycerol synthase 2 Encodes a type B monogalactosyldiacylglycerol (MGDG) synthase. Strongly induced by phosphate deprivation, and in non-photosynthetic tissues. Does not contribute to galactolipid synthesis under Pi-sufficient conditions but does under Pi starvation.	up
39	JCGZ_17800	13.6172	8.04808	1.9	AT1G77630 | Symbols: | Peptidoglycan-binding LysM domain-containing protein
40	JCGZ_18270	24.9876	7.30351	2.79	No in Arabidopsis. XP_003516861.1| PREDICTED: clavaminate synthase-like protein At3g21360-like [Glycine max]; XP_002445444.1| hypothetical protein SORBIDRAFT_07g019340 [Sorghum bicolor]
41	JCGZ_18908	10.0386	3.59794	7.12667	AT4G15960 | Symbols: | alpha/beta-Hydrolases superfamily protein. FUNCTIONS IN: epoxide hydrolase activity, catalytic activity; INVOLVED IN: biological_process unknown; LOCATED IN: mitochondrion;
42	JCGZ_20709	13.0794	7.46	4.81667	AT1G01900.1 | Symbols: ATSBT1.1, SBTI1.1 | subtilase family protein. Encodes AtSBT1.1, a subtilisin-like serine protease. Cleaves the phytosulfokine AtPSK4, a growth promoting peptide
43	JCGZ_20815	10.0773	8.73233	14.2	AT5G59090 | Symbols: ATSBT4.12, SBT4.12 | subtilase 4.12. proteolysis, response to jasmonic acid
44	JCGZ_21119	4.44288	4.11207	4.06	AT3G10290 | Symbols: | Nucleotide-sugar transporter family protein Protein of unknown function DUF250 (InterPro:IPR004853); Molecular cloning of two Arabidopsis UDP-galactose transporters by complementation of a deficient chinese hamster ovary cell line.
45	JCGZ_21193	9.52855	6.33801	9.30333	AT1G64210 | Symbols: | Leucine-rich repeat protein kinase family protein
46	JCGZ_22158	3.75	4.81034	4.87333	AT3G11480 | Symbols: BSMT1, ATBSMT1 | S-adenosyl-L-methionine-dependent methyltransferases superfamily protein// gene encodes a SABATH methyltransferase that methylates both salicylic acid and benzoic acid. It is highly expressed in flowers, induced by biotic and abiotic stress and thought to be involved in direct defense mechanism.
47	JCGZ_22412	5.43646	4.00478	3.38	AT2G17500 | Symbols: | Auxin efflux carrier family protein
48	JCGZ_24797	7.88015	8.87198	26.8433	AT1G73010 | Symbols: ATPS2, PS2 | phosphate starvation-induced gene 2 Encodes PPsPase1, a pyrophosphate-specific phosphatase catalyzing the specific cleavage of pyrophosphate (Km 38.8 uM) with an alkaline catalytic pH optimum. Expression is upregulated in the shoot of cax1/cax3 mutant.	up
49	JCGZ_25065	18.2442	6.86066	1.45333	AT1G53560 | Symbols: | Ribosomal protein L18ae family
50	JCGZ_26104	7.86957	4.46264	6.11333	AT5G52390 | Symbols: | PAR1 protein FUNCTIONS IN: molecular_function unknown; INVOLVED IN: biological_process unknown; LOCATED IN: endomembrane system.
51	JCGZ_26419	3.41	4.25311	12.21	AT5G50700 | Symbols: HSD1 | hydroxysteroid dehydrogenase 1 . Transcription of HSD1 is specifically and highly induced in oil-accumulating tissues of mature seeds; transcript disappears during germination.
52	JCGZ_00145	0.282819	0.261293	151.233	AT3G49390 | Symbols: CID10 | CTC-interacting domain 10
53	JCGZ_00413	0.23609	0.278561	226.02	AT3G51740 | Symbols: IMK2 | inflorescence meristem receptor-like kinase 2
54	JCGZ_01344	0.193916	0.286664	15.16	AT3G55730 | Symbols: MYB109, AtMYB109 | myb domain protein 109
55	JCGZ_03845	0.327853	0.294351	9.35	AT1G32060 | Symbols: PRK | phosphoribulokinase
56	JCGZ_04847	0.310977	0.203862	28.8167	AT1G14600 | Symbols: | Homeodomain-like superfamily protein
57	JCGZ_07623	0.269231	0.202612	25.7433	AT1G72820 | Symbols: | Mitochondrial substrate carrier family protein// Identification of an Arabidopsis mitochondrial succinate-fumarate translocator.
58	JCGZ_08230	0.192001	0.225477	63.9867	AT1G19940 | Symbols: AtGH9B5, GH9B5 | glycosyl hydrolase 9B5
59	JCGZ_09129	0.329424	0.19153	100.733	AT1G30690 | Symbols: | Sec14p-like phosphatidylinositol transfer family protein
60	JCGZ_11088	0.223511	0.304348	24.3233	AT2G26920 | Symbols: | Ubiquitin-associated/translation elongation factor EF1B protein
61	JCGZ_11667	0.133727	0.250599	9.51667	AT5G61340 | Symbols: | unknown protein
62	JCGZ_11709	0.319961	0.157874	16.84	AT1G74310 | Symbols: ATHSP101, HSP101, HOT1 | heat shock protein 101
63	JCGZ_14121	0.287474	0.145874	15.9967	AT4G01690 | Symbols: PPOX, HEMG1, PPO1 | Flavin containing amine oxidoreductase family
64	JCGZ_14129	0.142547	0.195515	19.36	AT4G01680 | Symbols: MYB55, AtMYB55 | myb domain protein 55 AT1G09540 | Symbols: MYB61, ATMYB61 | myb domain protein 61
65	JCGZ_14271	0.302925	0.243883	29.56	AT5G08610 | Symbols: | P-loop containing nucleoside triphosphate hydrolases superfamily protein
66	JCGZ_14518	0.320246	0.260683	70.7033	AT5G51600 | Symbols: PLE, ATMAP65-3, MAP65-3 | Microtubule associated protein (MAP65/ASE1) family protein
67	JCGZ_15890	0.241518	0.230515	15.3067	AT5G10920 | Symbols: | L-Aspartase-like family protein
68	JCGZ_16089	0.21547	0.289474	17.75	AT3G53010 | Symbols: | Domain of unknown function (DUF303)
69	JCGZ_17952	0.239845	0.273713	81.1333	AT1G27920 | Symbols: MAP65-8 | microtubule-associated protein 65-8
70	JCGZ_18656	0.264919	0.312364	14.5433	AT2G22420.1 | Symbols: | Peroxidase superfamily protein
71	JCGZ_18767	0.257468	0.29449	189.693	AT4G33650 | Symbols: ADL2, DRP3A | dynamin-related protein 3A Encodes a protein with high sequence similarity to the dynamin superfamily. Among those members ADL2 was most closely related to Dnm1p of yeast and likely a member of the Vps1p subfamily. Widely expressed in various tissues with highest expression in flower tissues. Localizes to the chloroplast, mitochondrion and peroxisome. Involved i…
72	JCGZ_18788	0.300689	0.208444	122.1	AT4G38660 | Symbols: | Pathogenesis-related thaumatin superfamily protein
73	JCGZ_19183	0.284158	0.155628	63.5467	AT3G58060 | Symbols: | Cation efflux family proteinA role for the AtMTP11 gene of Arabidopsis in manganese transport and tolerance.
74	JCGZ_19489	0.319081	0.284127	113.47	AT5G63810 | Symbols: BGAL10 | beta-galactosidase 10
75	JCGZ_19575	0.276443	0.242449	26.2533	AT4G34880 | Symbols: | Amidase family protein
76	JCGZ_20483	0.318856	0.274855	29.98	AT5G41790.1 | Symbols: CIP1 | COP1-interactive protein 1
77	JCGZ_21582	0.228471	0.265083	14.36	AT5G45800 | Symbols: MEE62 | Leucine-rich repeat protein kinase family
78	JCGZ_23019	0.330558	0.328525	237	AT4G30320 | Symbols: | CAP (Cysteine-rich secretory proteins, Antigen 5, and Pathogenesis-related 1 protein) superfamily protein
79	JCGZ_23404	0.232846	0.34175	16.9	AT5G27330 | Symbols: | Prefoldin chaperone subunit family protein
80	JCGZ_25095	0.312751	0.276845	36.06	AT5G02010 | Symbols: ATROPGEF7, ROPGEF7 | RHO guanyl-nucleotide exchange factor 7
81	JCGZ_25413	0.25662	0.326872	11.69	AT3G18660 | Symbols: PGSIP1, GUX1 | plant glycogenin-like starch initiation protein 1. GLUCURONIC ACID SUBSTITUTION OF XYLAN 1.GUX1 and GUX2, recently identified as glucuronyltransferases, are both required for substitution of the xylan backbone with [Me]GlcA
82	JCGZ_25508	0.302677	0.318531	35.5933	AT5G06860 | Symbols: PGIP1, ATPGIP1 | polygalacturonase inhibiting protein 1
83	JCGZ_25712	0.327849	0.238475	16.2633	AT3G14410 | Symbols: | Nucleotide/sugar transporter family protein
84	JCGZ_25783	0.257688	0.269096	15.27	AT4G28310 | Symbols: | unknown protein
85	JCGZ_26893	0.20326	0.245748	14.23	AT5G13920 | Symbols: | GRF zinc finger / Zinc knuckle protein
86	JCGZ_26983	0.147841	0.145505	12.48	AT1G19780 | Symbols: ATCNGC8, CNGC8 | cyclic nucleotide gated channel 8
		0	0.5	1	2	5	10

## Sheet: L3-fold
	Table S2. The genes most strongly (≥3-fold) differentially expressed in roots and leaves under the Pi-deficient 2 d and 16 d after the onset of treatment.
	Table S2B. The genes most up- and down- regulated in physic nut leaves under the Pi-deficient 2 d and 16 d after the onset of treatment.
	In leaves	Expression ratio of P– to P+				Changes of ortholog genes in Arabidopsis under Pi starvation stress
	Gene identifier	L2d	L16d	Average level in leaves of CK plants (TPM)	AtBESTBLAST	Misson et al., 2005, PNAS, 102: 11934–11939; Müller et al., 2007, Plant Physiol, 143:156–171
	ncRNA Precursor				Precursor sequence
	MT4/IPS2	23.7615	596.158	18.9	ATTCCGATAACATAAAAACAACTCAATTTTAATCTGCAAACCCTCTTCCCACACAAACACTCACCTTCCCATTATGTGACTCTCTTGGCTCTCTCCGGCCACCCCTTTAGGGTGGCTGGAGGCCGGCTGCTTGGCTTGGTGTTTGTGAAGTTATTTGTGTGTGTCTGTGTGTGTGCATGTACGGTCTGTCCCAGTAATTTTCTGTGATTCTTCGTAGAAGTATTGTAGAAAATTGTAATGGGAGGGTGTGGTTGGACCTGAATCGCCTTATTTAAGGGCGGTTTGTCTTCTTATAGGGCAACTTCGATCCTTTGGCATTTTCATTTCCTTTTGAAATCTCTCGTTGCTAGCTTTATATGCAAGAGTGAAGCTTGGAGGAAACTTTCACAAGGGCGAGTC…
	IPS1-1	335.84	993.057	1.5175	TCATCAACCACTAGAACCATATGAGAGAAAACCCACATATCACACCAAGTTTTCACCCTCCACTCCTTTGGAGGGATCAAGAGATTGGATCCTCCCTACAACATAAACATCCCCCCAATATATTCTCATTTTCTTCTATCCTATGTATTGGTATGGGTGGTCGGAGGTGGCTGCCGCCGGTGCCAGGGAGCCAAGGTGACAATTGAAGCAGGGAAGATGAGGATGAAGAGGGATGTGGAGAGTAATTAAGGTCATGATGGTTTTTAAACCATTAGGGCAACTATGATCCTTTGGCAACATGTTATTATGATGGGGAATATATATGTGGGTTTTACTTTTATTTTACTAATATTTGTGTTTTCCTTTTTATTTGTTGTTTGAGGGACATGATGAGATCAT…
	IPS1-2	132.129	2016	5.3975	TTCATCATTTCTATTCCTACAAAACAAAACCCACATATCACACCAAGTTTTCACCCTCCACTCCTTTGGAGGGATCAAGAGATTGGATCCTCCCTACAACATAAACATCCCCCCAATATATTCTCATTTTCTTCTATCCTATGTATTGGTATGGGTGGTCGGAGGTGGCTGCCGCCGTTGCCAGGGAGCCAAGGAGACAATTGAAGCAGGGAAGATGAGGATGAAGAGGGATGTGGAGAGTAATTAAGGTCATGATGGTTTTTAAACCATTAGGGCAACTATGATCCTTTGGCAATATGTATTATTATGAACGTTGCTGAACACATTTATGTTACCATGTTATTATAATGGGGAATATATATATGGGTTTTGCTTTTATTTTACTAAGATGTGTTTTCC…
	miR399a	38.9	59.8	0.1	CTAGAAGCACTGAAAAGCCAAAATATAATATAGAGGCCAAGAAAGAAAAGGGAACGGGAAAATGAAAGGGAAGGGAATATGGCATATGAAGATATGCTGGTGTTGTAATGCGACTAAAAATCATCATCACTGAAGGAGCATCTGCATCTCCTTCCTGCTGCACTTTTTCCCCTCTTATAACCTACAGACCATGGACAAAAAAAGGTTGAGCAGAAGAAGAATCTCACACACCTTTGTGAGATTTTCTCAAGATTTTTGAACACATAAAAAAGATTTCTAAAAAAATCAAAAAGGCTTTCAGAGGATATCCATGGCATAATCCTCAAGCATATGGCATTTCTTCTGTAGTTTATTCCATCAAACTTAAAGCTCCTTAGTTTATATAACAGCAAAATCCAT…
	miR399b	272.1	934.5	0.1	TCAATATTTAATGTCATTTGGCAAACACGAGATACATCGAATGCCCCTCCTTTAATACAGAAGTTTCAGAGATATAAAATCTTAAAGCTCCTTGCTAGCTCCAGATAAAATTTACAAAGTATCTTATAAATTACATATTAAACAATGGAAAAGAAAAATGCAACATAGTAATTGGGATTGATTAAAAACTTAATTAGTTAAAAGATAGCATAAACCTGTTTTTATACTTGCAGAAAATATATTCTCCAGCAAACTTATGCAGTTCGAAATTGAGACTCCCCCTCGGATAATCTTAAAAACATATTCTCAGATTGACCTGGAGCAAAGTTACTTTTTAAAAATAATGTAGAAATGCTCTCAAAAAAAAAAAAAAAAAAAAAAAATCAATCCTAATGAATA…
	miR399c	88.0577	2884.8	0.5825	GTTGACACCGAGAAAAATTCTACAGAGATATATACAGTTGGAAATTTGTGGTCCTGACTTTTCAAAAAGAAAATCCCATGCGTATTACCAAAGTTGACAGTATAAAATGTGTTAATCGCCGTGTTTTAAACACTGGAATCAAATTAAACAGGTGTTTCATTTATATATGCATATAAATAATTAAACGACATCGTCATAAACAGATTTTTCTATGTTATAAACATGCGCAAGCGCGTGTATGTGCATGCAGATATATGCATGAGAATTGGCAAAAGTCGTTGAAAGGATATAAAGCCCTATCCAGTGAAGGGGGACCAAAACCCATGTTTGGGAAAGAGTTGAGAGAACTTATTGTGGAAGAAGAAGCTCTTGAGGAATGATCCGCAGGATAATTCTATC…
87	JCGZ_00424	9.90194	3.02146	107.4	AT1G07030 | Symbols: | Mitochondrial substrate carrier family protein; phylogeneti crelation to mitochondrial iron transporters
88	JCGZ_01227	5.74257	4.04818	20.9033	AT3G56040 | Symbols: UGP3 | UDP-glucose pyrophosphorylase 3//A Chloroplastic UDP-Glucose Pyrophosphorylase from Arabidopsis Is the Committed Enzyme for the First Step of Sulfolipid Biosynthesis.	up
89	JCGZ_01327	3.30211	3.88559	70.33	AT2G39950 | Symbols: | unknown protein; flocculation protein
90	JCGZ_01556	7.57532	8.51444	10.3933	AT3G52190 | Symbols: PHF1 | phosphate transporter traffic facilitator 1. Encodes a plant specific protein structurally related to the SEC12 proteins of the early secretory pathway. Mutation of PHF1 impairs Pi transport. Expression was detected in all tissues, and was induced by Pi starvation. Localized in endoplasmic reticulum (ER), and mutation of PHF1 resulted in ER retention and reduced accumu…	up
91	JCGZ_01559	7.9593	8.10072	2.21	AT3G52180 | Symbols: ATPTPKIS1, DSP4, SEX4, ATSEX4 | dual specificity protein phosphatase (DsPTP1) family protein
92	JCGZ_02070	6.90381	4.62263	14.48	AT4G13110 | Symbols: | BSD domain-containing protein. It can be found associated with other domains such as the BTB domain (see PDOC50097) or the U-box in multidomain proteins. The function of the BSD domain is yet unknown
93	JCGZ_02326	20.2833	4.32299	46.2267	AT1G08650 | Symbols: PPCK1, ATPPCK1 | phosphoenolpyruvate carboxylase kinase//BHLH32 modulates several biochemical and morphological processes that respond to Pi starvation in Arabidopsis	up
94	JCGZ_02559	3.38449	3.71041	9.50667	AT4G17900 | Symbols: | PLATZ transcription factor family protein
95	JCGZ_02576	5.85042	3.68412	6.57333	AT1G64940 | Symbols: CYP89A6/AT1G64900.1 | Symbols: CYP89A2	up
96	JCGZ_02700	6.76821	4.73623	26.9733	AT3G03790 | Symbols: | ankyrin repeat family protein / regulator of chromosome condensation (RCC1) family protein	up
97	JCGZ_03385	5.16444	3.3639	42.3667	AT4G16520 | Symbols: ATG8F | Ubiquitin-like superfamily protein. Selective autophagy in the aid of plant germination and response to nutrient starvation
98	JCGZ_04309	4.8059	6.16522	18.2633	AT4G34310 | Symbols: | alpha/beta-Hydrolases superfamily protein
99	JCGZ_04311	6.74642	7.52415	19.48	AT4G23000 | Symbols: | Calcineurin-like metallo-phosphoesterase superfamily	up
100	JCGZ_04709	12.3558	86.3603	30.0033	AT1G23110 | /AT1G70900.1 | Symbols: | unknown protein. This family consists of several ceramidases. Ceramidases are enzymes involved in regulating cellular levels of ceramides, sphingoid bases, and their phosphates, EC:3.5.1.23. Genome-wide Analysis of the Arabidopsis Leaf Transcriptome Reveals Interaction of Phosphate and Sugar Metabolism.	up
101	JCGZ_04732	21.814	25.5755	2.59667	At2g43050/AT1G23200 | Symbols: | Plant invertase/pectin methylesterase inhibitor superfamily FUNCTIONS IN: enzyme inhibitor activity, pectinesterase activity; INVOLVED IN: cell wall modification; LOCATED IN: endomembrane system, cell wall, plant-type cell wall;	up
102	JCGZ_05600	4.31498	3.32924	32.63	AT3G45640 | Symbols: ATMPK3, MPK3, ATMAPK3
103	JCGZ_06150	3.19155	3.34264	9.34667	AT1G15370 | Symbols: | SNARE-like superfamily protein
104	JCGZ_06151	2687	160.4	0.343333	AT5G20150 ATSPX1, SPX DOMAIN GENE 1, SPX1	up
105	JCGZ_06165	25.3462	2693	1.01667	AT5G54300 | Symbols: | Protein of unknown function (DUF761) cotton fiber-like protein. GhCFE1A decorates cortical ER, interacts with actin, and functions in fibre cell elongation
106	JCGZ_06290	5.23628	4	23.7033	AT1G52280 | Symbols: AtRABG3d, RABG3d | RAB GTPase homolog G3D
107	JCGZ_06699	5.44295	5.71895	7.05333	AT4G19160 | Symbols: | transglutaminase family protein
108	JCGZ_06762	18.0814	27.029	0.963333	AT5G03910 | Symbols: ATATH12, ATH12 | ABC2 homolog 12
109	JCGZ_07171	6.28679	5.90578	13.4567	AT2G26660 | Symbols: ATSPX2, SPX2 | SPX domain gene 2	up
110	JCGZ_07532	18.6366	9.45423	70.4267	AT5G20790 | Symbols: | unknown protein INVOLVED IN: biological_process unknown; LOCATED IN: endomembrane system; phosphate deficiency induced gene	up
111	JCGZ_07691	3.8863	4.01923	12.5233	AT4G32520 | Symbols: SHM3 | serine hydroxymethyltransferase 3 .Encodes a serine hydroxymethyltransferase SHMT3 located in the plastid	up
112	JCGZ_07923	7.02534	14.837	28.7833	AT3G45140 | Symbols: LOX2, ATLOX2 | lipoxygenase 2
113	JCGZ_08189	7.49455	7.30272	4.24667	AT1G75850 |Symbols: VPS35B | VPS35 homolog B
114	JCGZ_08442	9.62976	5.59195	17.0633	AT1G20030 | Symbols: | Pathogenesis-related thaumatin superfamily protein
115	JCGZ_08499	3.42474	5.68707	5.62	AT2G29630 | Symbols: THIC | thiaminC
116	JCGZ_08882	11.0401	143.035	8.62333	AT4G24340 | Symbols: | Phosphorylase superfamily protein FUNCTIONS IN: catalytic activity; INVOLVED IN: nucleoside metabolic process; LOCATED IN: endomembrane system; CONTAINS InterPro DOMAIN/s: Nucleoside phosphorylase (InterPro:IPR000845), Nucleoside phosphorylase, family 1 (InterPro:IPR018017);
117	JCGZ_09029	3.0642	5.50853	35.1767	AT3G53620 | Symbols: AtPPa4, PPa4 | pyrophosphorylase 4 Identification of an Arabidopsis inorganic pyrophosphatase capable of being imported into chloroplasts.	up
118	JCGZ_09269	8.04442	6.14525	12.8267	AT5G13240 | Symbols: | transcription regulators
119	JCGZ_09470	1386	12.104	5.44333	AT4G38540 |Symbols: | FAD/NAD(P)-binding oxidoreductase family protein; defense response to fungus, oxidation-reduction process	up
120	JCGZ_09715	3.85497	3.41731	50.1767	AT5G62670 | Symbols: AHA11, HA11 | H(+)-ATPase 11. FUNCTIONS IN: ATPase activity; INVOLVED IN: cation transport, metabolic process, ATP biosynthetic process; LOCATED IN: plasma membrane, membrane
121	JCGZ_10030	8.80746	12.9142	20.6767	AT2G15960 | hypothetical protein
122	JCGZ_10075	3.18568	4.35006	18.0967	AT1G11750 | Symbols: CLPP6, NCLPP1, NCLPP6 | CLP protease proteolytic subunit6
123	JCGZ_10182	3.01938	3.16261	29.6167	AT3G27310 | Symbols: PUX1 | plant UBX domain-containing protein 1. The ubiquitin regulatory X (UBX) domain-containing protein TUG regulates the p97 ATPase and resides at the endoplasmic reticulum-golgi intermediate compartment
124	JCGZ_10743	12.7961	4.35464	3.58	AT2G17270 | Symbols: PHT3;3
125	JCGZ_11410	8.28301	12.1489	29.4133	At5g63130/AT3G48240 | Symbols: | Octicosapeptide/Phox/Bem1p family protein	up
126	JCGZ_11730	4.80074	20.4975	12.4533	At1g74210 | Symbols: | PLC-like phosphodiesterases superfamily protein //Encodes a member of the glycerophosphodiester phosphodiesterase (GDPD) family.Characterization of the Arabidopsis glycerophosphodiester phosphodiesterase (GDPD) family reveals a role of the plastid-localized AtGDPD1 in maintaining cellular phosphate homeostasis under phosphate starvation	up
127	JCGZ_12471	9.82558	3.89196	3.91333	AT4G37370 | Symbols: CYP81D8 | cytochrome P450, family 81, subfamily D, polypeptide 8. WD40 repeat-like-containing domain (InterPro:IPR011046), Breast carcinoma amplified sequence 3 (InterPro:IPR022175),	up
128	JCGZ_12609	3.70996	4.26824	20.1267	AT5G64500 | Symbols: | Major facilitator superfamily protein.lipid transport, transmembrane transport
129	JCGZ_13280	4.36163	5.69503	27.6933	AT1G52720 | Symbols: | unknown protein
130	JCGZ_13334	9.84174	21.4159	88.99	AT2G26660 | Symbols: ATSPX2, SPX2 | SPX domain gene 2	up
131	JCGZ_13757	7.67313	7.14765	15.42	AT1G05000 | Symbols: | Phosphotyrosine protein phosphatases superfamily	up
132	JCGZ_13862	4.5084	3.88809	16.1433	AT3G62970 |Symbols: | zinc finger (C3HC4-type RING finger) family protein
133	JCGZ_14118	6.86774	3.20997	10.7867	AT4G01720.1 | Symbols: WRKY47, AtWRKY47 | WRKY family transcription factor
134	JCGZ_14153	5.22745	7.00825	25.4633	AT2G46880 ATPAP14, PAP14, PURPLE ACID PHOSPHATASE 14	up
135	JCGZ_14301	17.0065	3.071	14.47	AT2G46270 |Symbols: GBF3 | G-box binding factor 3, encodes a bZIP G-box binding protein whose expression is induced by ABA. redox-regulated members of bZIP transcription factors involved in the early stages of Arabidopsis development
136	JCGZ_14392	6.25974	3.78534	35.4367	AT2G45910 | Symbols: | U-box domain-containing protein kinase family protein	up
137	JCGZ_14473	10.5789	9.93646	7.21667	AT1G63010 | Symbols: AtSPX-MFS3 Major Facilitator Superfamily with SPX (SYG1/Pho81/XPR1) domain-containing protein ;partial, only the C-domain//>sbi-miR396e MIMAT0011358 SorghTm bicolor miR396e//rryin EST CL1328.Contig2_All full length	up
138	JCGZ_14500	4.61505	7.63006	6.13333	AT2G45510 | Symbols: CYP704A2 | cytochrome P450, family 704, subfamily A, polypeptide 2. endoplasmic reticulum, integral component of membrane	up
139	JCGZ_14570	234.588	2884	0.786667	AT2G45130 | Symbols: ATSPX3, SPX3 | SPX domain gene 3 //Structure and Expression Profile of the Arabidopsis PHO1 Gene Family Indicates a Broad Role in Inorganic Phosphate Homeostasis.	up
140	JCGZ_14969	7.75461	8.42203	25.2267	AT5G66530 | Symbols: | Galactose mutarotase-like superfamily protein. FUNCTIONS IN: carbohydrate binding, isomerase activity, aldose 1-epimerase activity, catalytic activity; INVOLVED IN: galactose metabolic process, carbohydrate metabolic process; LOCATED IN: apoplast, chloroplast, chloroplast stroma	up
141	JCGZ_15136	746.9	679.3	0.1	AT3G07350 |Symbols: | sulfate/thiosulfate import ATP-binding protein, putative (DUF506)	up
142	JCGZ_15212	12.0814	109.654	1.41667	AT3G44510 | Symbols: | alpha/beta-Hydrolases superfamily protein. P-starvation responsed gene	up
143	JCGZ_15713	5.41919	8.89531	5.57	AT1G13750 | Symbols: | PAP1. purple acid phosphatase 1	up
144	JCGZ_15879	3.09909	6.97055	15.8567	AT4G33580 | Symbols: ATBCA5, BCA5 | beta carbonic anhydrase 5
145	JCGZ_16168	6.4701	3.56453	41.4533	AT3G10420 | Symbols: SPD1 | P-loop containing nucleoside triphosphate hydrolases superfamily protein. A Mutation in Arabidopsis SEEDLING PLASTID DEVELOPMENT1 Affects Plastid Differentiation in Embryo-Derived Tissues during Seedling Growth	up
146	JCGZ_16170	52.6765	4.8175	19.35	AT2G39210 | Symbols: | Nodulin-like; Major facilitator superfamily protein. Soybean lipid biosynthesis related genes
147	JCGZ_16500	18.2184	5.79534	10.1533	AT5G03210 | Encodes a small polypeptide contributing to resistance to potyvirus. AtDIP2 was shown to functionally interfere with AtDBP1 (DNA-binding protein phosphatase 1)
148	JCGZ_16853	3.12442	3.132	11.88	AT5G19440 | Symbols: | NAD(P)-binding Rossmann-fold superfamily protein. similar to Eucalyptus gunnii alcohol dehydrogenase of unknown physiological function (GI:1143445), apple tree, PIR:T16995; NOT a cinnamyl-alcohol dehydrogenase
149	JCGZ_17008	97.6834	82.1282	7.57667	AT5G20410 | Symbols: MGD2, ATMGD2 | monogalactosyldiacylglycerol synthase 2 Encodes a type B monogalactosyldiacylglycerol (MGDG) synthase. Strongly induced by phosphate deprivation, and in non-photosynthetic tissues. Does not contribute to galactolipid synthesis under Pi-sufficient conditions but does under Pi starvation.	up
150	JCGZ_17013	6.55226	3.98545	22.3367	No in Arabidopsis. XP_002530764.1| conserved hypothetical protein [Ricinus communis].Os02g0802800 [Oryza sativa Japonica Group]Armadillo-like helical domain containing protein
151	JCGZ_17020	8.97983	9.99465	14.7633	At4g10120/AT5G20280 | | Symbols: ATSPS1F, SPS1F | sucrose phosphate synthase 1F	up
152	JCGZ_17335	316.406	11.1863	6.80333	AT5G05340 | Symbols: | PEROXIDASE 52, PRX52. Encodes a protein with sequence similarity to peroxidases that is involved in lignin biosynthesis. responses to phosphate deprivation	up
153	JCGZ_17424	3.9689	3.40096	33.8967	At1g48370/AT3G17650 | Symbols: YSL5, PDE321 | YELLOW STRIPE like 5 Arabidopsis thaliana metal-nicotianamine transporter YSL5	up
154	JCGZ_17535	9.89018	10.0435	13.61	AT3G07130 | Symbols: ATPAP15, PAP15 | purple acid phosphatase 15 Transgenic expression of a novel M. truncatula phytase gene results in improved acquisition of organic phosphorus by Arabidopsis Molecular and biochemical characterization of AtPAP15, a purple acid phosphatase with phytase activity, in Arabidopsis.
155	JCGZ_17699	3.96899	12.1487	43.2833	At2g32830/AT3G54700 | Symbols: PHT1;7; AT2G32830.1 PHT1;5	up
156	JCGZ_18253	6.31553	3.00481	7.61	At3g25610/AT1G68710 | Symbols: | ATPase E1-E2 type family protein	up
157	JCGZ_18291	9.57849	8.33387	7.33333	At1g13300/AT1G25550 | Symbols: | myb-like transcription factor family protein. Overexpressing HRS1 Confers Hypersensitivity to Low Phosphate-Elicited Inhibition of Primary Root Growth in Arabidopsis thaliana	up
158	JCGZ_18342	5.82946	8.06859	2.93	AT1G68440 | Symbols: | unknown protein. several constitutive stress-responsive genes that are differentially upregulated due to perturbation of different stress signals, for example a gene (AT1G68440) involved in phenylpropanoid metabolism and polyamine catabolism as responsive to seven different stress signals
159	JCGZ_18863	3.43761	4.0135	10.6433	AT3G16510 | Symbols: | Calcium-dependent lipid-binding (CaLB domain) family protein/At4g15740	up
160	JCGZ_19585	3.07131	5.34483	37.1833	AT2G16600 | Symbols: ROC3 | rotamase CYP 3
161	JCGZ_20690	13.3605	16.4716	13.0867	AT2G45640 |Symbols: SAP18, ATSAP18 |Histone deacetylase complex, SAP18. SIN3 associated polypeptide P18 Involved in the regulation of salt stress. Expression of AtSAP18 is induced by NaCl, cold, drought, ABA, and ethylene treatment. AtSAP18 and HDA19 associate with ERF3 and ERF4 both in vitro and in vivo.
162	JCGZ_21068	3.53742	4.2351	59.0867	AT3G57540 | Symbols: | Remorin family protein	up
163	JCGZ_21119	134.846	7867	2.35667	AT3G10290 | Symbols: | Nucleotide-sugar transporter family protein Protein of unknown function DUF250 (InterPro:IPR004853); Molecular cloning of two Arabidopsis UDP-galactose transporters by complementation of a deficient chinese hamster ovary cell line.
164	JCGZ_21162	8.15407	3.59503	8.14333	AT1G05010 | Symbols: EFE, ACO4, EAT1 | ethylene-forming enzyme
165	JCGZ_21261	3.25045	3.42788	6.52333	AT1G61780 | Symbols: | postsynaptic protein-related
166	JCGZ_21357	5.87054	5.59037	21.01	AT4G21470 | Symbols: ATFMN/FHY, FMN/FHY | riboflavin kinase/FMN hydrolase// An Arabidopsis FAD Pyrophosphohydrolase, AtNUDX23, is Involved in the Flavin Homeostasis//Arabidopsis thaliana AtGpp1 and AtGpp2: two novel low molecular weight phosphatases involved in plant glycerol metabolism.	up
167	JCGZ_21443	4.02981	3.02613	10.44	AT2G33770 |Symbols: UBC24, ATUBC24, PHO2 | phosphate 2
168	JCGZ_21526	3.79441	3.07756	11.1	AT2G42360 | Symbols: | RING/U-box superfamily protein
169	JCGZ_21597	4.1898	4.77006	13.8233	AT2G42760 | Symbols: | unknown protein; CONTAINS InterPro DOMAIN/s: Protein of unknown function DUF1685 (InterPro:IPR012881);
170	JCGZ_21632	6.77805	5.07481	19.4467	AT4G18930 | Symbols: | RNA ligase/cyclic nucleotide phosphodiesterase family
171	JCGZ_21835	5.3211	19.8741	33.05	AT2G30550 | Symbols: | alpha/beta-Hydrolases superfamily protein. Encodes a lipase that hydrolyzes phosphatidylcholine, glycolipids as well as triacylglycerols.	up
172	JCGZ_21999	4.39785	3.55775	7.82667	AT1G03380 | Symbols: ATATG18G, ATG18G | homolog of yeast autophagy 18 (ATG18) G
173	JCGZ_22444	9.18605	14.593	4.26333	AT3G10150 | Symbols: ATPAP16, PAP16 | purple acid phosphatase 16	up
174	JCGZ_22458	21.1154	121.5	1.13	AT3G56790 | Symbols: | RNA splicing factor-related
175	JCGZ_23031	5.60533	5.56133	5.53333	AT5G57610 |Symbols: | Protein kinase superfamily protein with octicosapeptide/Phox/Bem1p domain	up
176	JCGZ_23266	14.4815	75.6281	1.87333	AT3G16785 | Symbols: PLDP1, PLDZ1, PLDZETA1, PLD ZETA 1 | phospholipase D P1
177	JCGZ_23539	3.40979	10.6026	2	AT3G04530 | Symbols: PPCK2, PEPCK2, ATPPCK2 | phosphoenolpyruvate carboxylase kinase 2	up
178	JCGZ_23800	4.75	3.24728	14.6833	AT3G59300 |Symbols: | Pentatricopeptide repeat (PPR) superfamily protein	up
179	JCGZ_23829	23.9087	6.29972	15.6733	At2g43050/AT3G59010 | Symbols: PME61 | pectin methylesterase 61	up
180	JCGZ_23993	2602	11.5778	3.55	AT5G53390 | Symbols: | O-acyltransferase (WSD1-like) family protein; Encodes a member of the bifunctional wax ester synthase/diacylglycerol acyltransferase gene family, WSD11, which is expressed in elongating petals and localized to the plasma membrane.
181	JCGZ_24758	9.11849	6.5552	21.9733	At3g13784 Symbols: AtcwINV5, CWINV5 | cell wall invertase 5	up
182	JCGZ_24797	88.2545	61.6248	30.0633	AT1G73010 | Symbols: ATPS2, PS2 | phosphate starvation-induced gene 2 Encodes PPsPase1, a pyrophosphate-specific phosphatase catalyzing the specific cleavage of pyrophosphate (Km 38.8 uM) with an alkaline catalytic pH optimum. Expression is upregulated in the shoot of cax1/cax3 mutant.	up
183	JCGZ_24865	21.7692	6.14744	2.72333	AT1G59870 | Symbols: PEN3, PDR8, ATPDR8, ABCG36, ATABCG36 | ABC-2 and Plant PDR ABC-type transporter family protein.Has Cd transporter activity (Cd2+ extrusion pump) and contributes to heavy metal resistance.
184	JCGZ_24914	3.87039	3.43482	37.73	AT5G64260 | Symbols: EXL2 | EXORDIUM like 2 . The Arabidopsis EXORDIUM-LIKE1 (EXL1) gene (At1g35140) is required for adaptation to carbon (C)- and energy-limiting growth conditions. EXL2 (At5g64260) and EXL4 (At5g09440) genes play similar roles.
185	JCGZ_25045	6.78229	17.4363	44.32	AT5G01220 | Symbols: SQD2 | sulfoquinovosyldiacylglycerol 2 involved in sulfolipid biosynthesis Lipid interacting regions in phosphate stress glycosyltransferase atDGD2 from Arabidopsis thaliana	up
186	JCGZ_25169	3.35418	3.61482	83.65	AT5G24660 | Symbols: LSU2 | response to low sulfur 2 |A Contribution to Identification of Novel Regulators of Plant Response to Sulfur Deficiency: Characteristics of a Tobacco Gene UP9C, Its Protein Product and the Effects of UP9C Silencing	up
187	JCGZ_25377	4224	3097	0.676667	AT4G38580 | Symbols: ATFP6, HIPP26, FP6 |/AT1G22990.1 | Symbols: HIPP22	up
188	JCGZ_26219	5.50215	8.5425	21.7267	AT2G36530 | Symbols: LOS2, ENO2 | Enolase an enolase. Protein is tyrosine-phosphorylated and its phosphorylation state is modulated in response to ABA in Arabidopsis thaliana seeds.
189	JCGZ_26254	15.6955	9.49038	26.4133	AT3G47420 | Symbols: ATPS3, PS3 | phosphate starvation-induced gene 3 GLYCEROL-3-PHOSPHATE PERMEASE 1	up
190	JCGZ_26419	6.9048	4.17403	93.2533	AT5G50700 | Symbols: HSD1 | hydroxysteroid dehydrogenase 1 . Transcription of HSD1 is specifically and highly induced in oil-accumulating tissues of mature seeds; transcript disappears during germination.
191	JCGZ_26833	17.4499	57.0763	43.0967	AT3G02040 | Symbols: SRG3 | senescence-related gene 3 Encodes a member of the glycerophosphodiester phosphodiesterase (GDPD) family. Has glycerophosphodiester phosphodiesterase activity. Functions in maintaining cellular phosphate homeostasis under phosphate starvation.	up
192	JCGZ_26963	6.87442	3.51612	33.93	AT1G80940 | Symbols: | unknown protein;	up
193	JCGZ_00843	0.143261	0.280451	46.68	AT3G01160 | Symbols: | FUNCTIONS IN: molecular_function unknown
194	JCGZ_00860	0.311313	0.220439	37.9533	AT4G27040 | Symbols: VPS22 | EAP30/Vps36 family protein
195	JCGZ_01246	0.292694	0.101601	44.0867	AT3G55990 | Symbols: ESK1, TBL29 | Plant protein of unknown function (DUF828). ESK1 is a novel negative regulator of cold acclimation. linked to normal development of the plant vascular system
196	JCGZ_01304	0.143769	0.313809	56.8433	AT2G38120 | Symbols: AUX1, WAV5, PIR1, MAP1 | one of a four-member Arabidopsis family of auxin importers
197	JCGZ_02271	0.284224	0.303503	47.0733	AT5G43700 | Symbols: ATAUX2-11, IAA4 | AUX/IAA transcriptional regulator family protein
198	JCGZ_02716	0.112536	0.152401	524.633	AT3G13520 | Symbols: |arabinogalactan protein 12. Arabinogalactan Proteins Are Required for Apical Cell Extension in the Moss Physcomitrella patens.
199	JCGZ_02913	0.0943747	0.249151	15.63	XP_003548695.1| uncharacterized protein LOC100794528 [Glycine max]
200	JCGZ_03049	0.200215	0.313268	18.24	AT3G11950 | Symbols: | TRAF-like superfamily protein The prenyltransferase
201	JCGZ_03440	0.300424	0.30644	65.82	AT4G16780 | Symbols: ATHB-2, HAT4, ATHB2, HB-2 | homeobox protein 2 . control of vegetation proximity
202	JCGZ_03622	0.0281432	0.246201	28.24	AT3G18050 | Symbols: | unknown protein. gibberellic acid mediated signaling pathway
203	JCGZ_04449	0.105689	0.299159	59.7967	AT1G75280 | Symbols: | NmrA-like negative transcriptional regulator family protein
204	JCGZ_05623	0.129863	0.290843	55.45	AT3G45850 | Symbols: | P-loop containing nucleoside triphosphate hydrolases superfamily protein
205	JCGZ_06474	0.0265957	0.186539	28.9133	XP_002533300.1| RNA binding protein, putative [Ricinus communis]
206	JCGZ_06569	0.129392	0.22958	36.94	AT1G11000 | Symbols: MLO4, ATMLO4 | Seven transmembrane MLO family protein
207	JCGZ_06871	0.159864	0.299779	45.74	AT5G18280 | Symbols: ATAPY2, APY2 | apyrase 2. promote growth in Arabidopsis. apy1apy2 double-knockout plants were dwarf, due primarily to reduced cell elongation.
208	JCGZ_06986	0.234026	0.311551	86.7467	AT5G26220 | Symbols: | ChaC-like family protein. CONTAINS InterPro DOMAIN/s: ChaC-like protein (InterPro:IPR006840); (Low Sulfur 5, LS5), that belong among genes with the highest degree of up-regulation upon sulfate starvation	down
209	JCGZ_07147	0.0736905	0.183059	1339.53	AT5G46900 | Symbols: | Bifunctional inhibitor/lipid-transfer protein/lipid transport
210	JCGZ_07276	0.158359	0.298064	22.8067	AT4G29080 | Symbols: IAA27 | phytochrome-associated protein 2
211	JCGZ_07493	0.0532817	0.274785	22.0033	AT2G05920 | Symbols: | Subtilase family protein
212	JCGZ_07533	0.0293493	0.232015	148.247	AT5G20740 | Symbols: | Plant invertase/pectin methylesterase inhibitor superfamily protein. regulation of shoot apical meristem development
213	JCGZ_07563	0.232487	0.31439	23.93	AT3G43300 | Symbols: ATMIN7 | HOPM interactor 7. AtMIN7 encodes one of the eight members of the Arabidopsis adenosine diphosphate (ADP) ribosylation factor (ARF) guanine nucleotide exchange factor (GEF) protein family. The AFR GEF proteins are key components of the vesicle trafficking system in eukaryotic cells. HopM1 mediates the destruction of AtMIN7 via the host proteasome.
214	JCGZ_07746	0.16504	0.106711	16.8633	AT1G58360.1 | Symbols: AAP1, NAT2 | amino acid permease 1
215	JCGZ_07913	0.0917979	0.250791	20.5133	AT5G12900 | Symbols: | unknown protein
216	JCGZ_08041	0.0648968	0.191809	34.6933	AT1G20850 | Symbols: XCP2 | xylem cysteine peptidase 2. proteolysis
217	JCGZ_08074	0.0101857	0.102202	28.74	AT4G38260 | transport/golgi organization-like protein (DUF833) (DUF833)
218	JCGZ_08989	0.222656	0.269311	15.53	AT4G17180 | Symbols: | O-Glycosyl hydrolases family 17 protein
219	JCGZ_09042	0.0375748	0.0593506	167.17	AT5G02540 | Symbols: | NAD(P)-binding Rossmann-fold superfamily protein
220	JCGZ_09748	0.244438	0.310328	24.6133	AT3G28857 | Symbols: | basic helix-loop-helix (bHLH) DNA-binding family protein. involved in gibberellic acid mediated signaling pathway,
221	JCGZ_10057	0.112882	0.325375	29.56	AT3G18870 | Symbols: | Mitochondrial transcription termination factor family
222	JCGZ_10064	0.144444	0.12856	10.4	AT1G47740 | Symbols: | PPPDE putative thiol peptidase family protein
223	JCGZ_11370	0.133659	0.0836988	36.7733	AT5G63180 | Symbols: | Pectin lyase-like superfamily protein
224	JCGZ_11669	0.269204	0.320669	10.49	AT1G18670 | Symbols: IBS1 | Protein kinase superfamily
225	JCGZ_12005	0.204258	0.321898	22.56	AT1G22060 | Symbols: | LOCATED IN: vacuole; FBD, F-box and Leucine Rich
226	JCGZ_12020	0.232416	0.28877	18.0133	AT1G12350 | Symbols: ATCOAB, COAB | 4-phospho-panto-thenoylcysteine synthetase. At1g12350 encodes phosphopantothenoylcysteine synthetase (phosphopantothenoylcysteine ligase). Its molecular function was shown to add cysteine forming (R)-4’-phospho-N-pantothenoylcysteine (PPC). in coenzyme A biosynthesis.
227	JCGZ_12650	0.151204	0.29387	261.79	No
228	JCGZ_12672	0.293592	0.223841	25.7233	AT4G17870 | Symbols: PYR1, RCAR11 | Encodes a member of the PYR (pyrabactin resistance )/PYL(PYR1-like)/RCAR (regulatory components of ABA receptor) family proteins with 14 members. PYR/PYL/RCAR family proteins function as abscisic acid sensors.	down
229	JCGZ_12924	0.330845	0.200894	82.4467	AT1G04680 | Symbols: | Pectin lyase-like superfamily protein
230	JCGZ_13043	0.321059	0.250444	12.9567	AT3G02600 | Symbols: LPP3, ATLPP3 | lipid phosphate phosphatase 3
231	JCGZ_13242	0.205494	0.123717	20.8667	AT1G70830 | Symbols: MLP28 | MLP-like protein 28. MLP28 family member is associated with the LCR regulation that is critical for normal Arabidopsis development.
232	JCGZ_13414	0.0929619	0.318678	46.6633	AT1G65590 | Symbols: HEXO3, ATHEX1 | beta-hexosaminidase 3
233	JCGZ_13851	0.0351371	0.124221	31.85	AT2G47930 | Symbols: |arabinogalactan protein 26
234	JCGZ_14195	0.168434	0.17152	56.82	AT4G00820 | Symbols: iqd17 | IQ-domain 17
235	JCGZ_14239	0.174688	0.31275	19.48	AT4G10840 | Symbols: | Tetratricopeptide repeat (TPR)-like superfamily protein
236	JCGZ_15159	0.126289	0.307223	59.6467	AT5G48630 | Symbols: | Cyclin family protein ;FUNCTIONS IN: cyclin-dependent protein kinase activity; INVOLVED IN: regulation of cell cycle;
237	JCGZ_15604	0.163254	0.225424	63.0233	AT1G69600 | Symbols: ZFHD1, ATHB29, ZHD11 | zinc finger homeodomain 1
238	JCGZ_15624	0.0594361	0.12706	278.08	AT1G69530 | Symbols: ATEXPA1, EXP1, AT-EXP1, ATEXP1, ATHEXP ALPHA 1.2, EXPA1 | expansin A1
239	JCGZ_15776	0.151062	0.260351	96.9033	AT4G39860 | Symbols: | unknown protein
240	JCGZ_16484	0.0487805	0.172291	9.24	AT3G53380 | Symbols: | Concanavalin A-like lectin protein kinase family protein
241	JCGZ_16734	0.0514493	0.214491	38.5	AT3G12610 | Symbols: DRT100 | Leucine-rich repeat (LRR) family
242	JCGZ_17174	0.209121	0.299695	103.97	XP_002339333.1| predicted protein [Populus trichocarpa] XP_003532165.1| PREDICTED: uncharacterized protein LOC100807265 [Glycine max]
243	JCGZ_17583	0.0056138	0.204651	52.3333	XP_002263833.1| PREDICTED: uncharacterized protein LOC100261331 [Vitis vinifera]
244	JCGZ_17865	0.230245	0.282277	15.4667	AT1G13170 | Symbols: ORP1D | OSBP(oxysterol binding protein)-related protein 1D
245	JCGZ_17875	0.167398	0.306794	173.32	AT1G67750 | Symbols: | Pectate lyase family protein
246	JCGZ_18255	0.0507964	0.262816	18.36	ABK95386 | unknown [Populus trichocarpa]
247	JCGZ_18285	0.0548661	0.297809	16.4467	AT1G13250 | Symbols: GATL3 | galacturonosyltransferase-like 3.carbohydrate biosynthetic process, cell wall organization, pectin biosynthetic process, polysaccharide biosynthetic process
248	JCGZ_18681	0.0558937	0.177617	15.17	AT1G26290 | Symbols: | unknown protein
249	JCGZ_19587	0.00589182	0.15859	1550.74	AT4G38770 | Symbols: PRP4, ATPRP4 | proline-rich protein 4
250	JCGZ_19603	0.0522505	0.329162	1015.06	AT1G17810 | Symbols: BETA-TIP | beta-tonoplast intrinsic protein. water channel activity
251	JCGZ_19847	0.0280228	0.142519	51.7733	AT5G15230 | Symbols: GASA4 | GAST1 protein homolog 4. GIBBERELLIN-REGULATED PROTEIN 4
252	JCGZ_19862	0.0697098	0.167403	241.2	AT1G69530 | Symbols: ATEXPA1, EXP1, AT-EXP1, ATEXP1, ATHEXP ALPHA 1.2, EXPA1| expansin A1
253	JCGZ_19925	0.142933	0.232804	26.2167	AT5G15530 | Symbols: BCCP2, CAC1-B | biotin carboxyl carrier protein 2
254	JCGZ_20426	0.00844511	0.176193	21.37	AT5G46290 | Symbols: KASI, KAS1 | 3-ketoacyl-acyl carrier protein synthase I	down
255	JCGZ_20548	0.299622	0.326522	37.8033	AT4G23500 | Symbols: | Pectin lyase-like superfamily protein
256	JCGZ_20636	0.247525	0.32795	16.7433	AT1G12780 | Symbols: UGE1, ATUGE1 | UDP-D-glucose/UDP-D-galactose 4-epimerase 1
257	JCGZ_20693	0.144831	0.27593	13.2	AT4G22910 | Symbols: FZR2, CCS52A1 | FIZZY-related 2 FUNCTIONS IN: signal transducer activity; INVOLVED IN: trichome branching, signal transduction, DNA endoreduplication, cell growth; LOCATED IN: chloroplast, heterotrimeric G-protein complex; WD40 repeat-like-containing domain:IPR011046(1)
258	JCGZ_20785	0.0487261	0.184717	64.5667	AT4G12420 | Symbols: SKU5 | Cupredoxin superfamily protein. related structurally to the multiple-copper oxidases ascorbate oxidase and laccase, though it lacks the copper-binding domains. The protein is glycosylated and GPI-anchored. It is localized to the plasma membrane and the cell wall. The gene is expressed most strongly in expanding tissues.	down
259	JCGZ_20865	0.132782	0.29174	63.07	AT3G59480 | Symbols: | pfkB-like carbohydrate kinase family protein
260	JCGZ_21423	0.318552	0.327747	13.14	AT4G17020 | Symbols: | transcription factor-related FUNCTIONS IN: RNA polymerase II transcription factor activity; INVOLVED IN: DNA repair, regulation of transcription, DNA-dependent; LOCATED IN: endomembrane system, nucleus;
261	JCGZ_21594	0.00063857	0.0956679	11.5967	AT4G18780 | Symbols: CESA8, IRX1, ATCESA8, LEW2 | cellulose synthase family protein
262	JCGZ_21787	0.0140347	0.121631	246.523	AT1G24020 | Symbols: MLP423 | MLP-like protein 423
263	JCGZ_21788	0.175816	0.0194925	69.7433	AT1G70260 | Symbols: | nodulin MtN21 /EamA-like transporter family protein
264	JCGZ_22513	0.259518	0.322206	126.06	AT1G14860 | Symbols: atnudt18, NUDT18 | nudix hydrolase homolog 18. A family of Nudix hydrolases is widespread among eukaryotes, bacteria, archaea, and viruses and consists mainly of pyrophosphohydrolases that act upon substrates of general structure nucleoside diphosphates linked to some moiety X to yield nucleoside monophosphate plus phosphate-X
265	JCGZ_22547	0.0506187	0.146429	23.7167	AT2G01820 | Symbols: | Leucine-rich repeat protein kinase family protein
266	JCGZ_23007	0.329637	0.196855	23.6	AT4G25760 | Symbols: ATGDU2, GDU2 | glutamine dumper 2
267	JCGZ_23102	0.284751	0.242091	10.09	AT5G13290 | Symbols: SOL2, CRN | Protein kinase superfamily protein. cell wall organization
268	JCGZ_23375	0.034936	0.0774854	17.16	AT1G54820.1 | Symbols: | Protein kinase superfamily
269	JCGZ_23404	0.1925	0.285196	123.913	AT5G27330 | Symbols: | Prefoldin chaperone subunit family protein
270	JCGZ_23499	0.19056	0.306904	26.04	AT5G43700 | Symbols: ATAUX2-11, IAA4 | AUX/IAA transcriptional regulator family protein. GFP accumulation controlled by an auxin-responsive promoter as a non-destructive assay to monitor early auxin response.
271	JCGZ_23584	1.30049e-05	0.11712	297.85	AT5G33370 | Symbols: | GDSL-like Lipase/Acylhydrolase superfamily protein	down
272	JCGZ_23699	0.183725	0.330125	32.25	AT5G03760 | Symbols: ATCSLA09, CSLA09, ATCSLA9, CSLA9, RAT4 |encodes a beta-mannan synthase
273	JCGZ_24702	0.0183928	0.123063	535.037	AT1G72610 | Symbols: GLP1, ATGER1, GER1 | germin-like protein 1 .GLPs could be a class of receptors localized in the ECM and involved in physiological and developmental processes as well as stress response
274	JCGZ_24743	0.0761261	0.333861	13.0667	AT2G19460 | Symbols: | Protein of unknown function (DUF3511)
275	JCGZ_25533	0.105888	0.207415	61.9367	AT2G05990 | Symbols: MOD1, ENR1 |Encodes enoyl-ACP reductase a component of the fatty acid synthase complex
276	JCGZ_25601	0.0236473	0.229508	26.81	AT5G15780 | Symbols: | Pollen Ole e 1 allergen and extensin family protein
277	JCGZ_25966	0.0202556	0.000524934	38.6833	AT1G74670 | Symbols: | Gibberellin-regulated family protein
278	JCGZ_26077	0.055749	0.234075	427.777	AT5G23940 | Symbols: EMB3009, PEL3, DCR | Encodes PERMEABLE LEAVES3 (PEL3), a putative acyl-transferase. Mutation in this locus results in altered trichome phenotype
279	JCGZ_26239	0.110465	0.114525	9.28667	AT5G62360 | Symbols: | Plant invertase/pectin methylesterase inhibitor. PMEI
280	JCGZ_26795	0.121686	0.321162	36.54	AT4G39230| Symbols: | NmrA-like negative transcriptional regulator family protein. encodes a protein whose sequence is similar to phenylcoumaran benzylic ether reductase (PCBER), which catalyzes NADPH-dependent reduction of 8-5' linked lignans such as dehydrodiconiferyl alcohol to give isodihydrodehydrodiconiferyl alcohol.
281	JCGZ_26867	0.304116	0.297195	80.1133	AT5G14060 | Symbols: CARAB-AK-LYS | Aspartate kinase family protein	down
		0	0.5	1	2	5	10
